# Supplementary material for: Shape-controlled synthesis and characterization of cobalt oxides hollow spheres and octahedra
Source: Royal Society of Chemistry journal article supplement (doi:10.1039/c2dt12403c), 2012-01-01
Supplement: c2dt12403c.pdf [file c2dt12403c.pdf]

## Electronic Supplementary Information (ESI) for Dalton Transactions

This journal is © The Royal Society of Chemistry 2011

### Shape-controlled synthesis and characterization of cobalt oxides hollow 5 spheres and octahedras

Rongrong Shi,<sup>a,b,c</sup> Gen Chen,<sup>a</sup> Wei Ma,<sup>a</sup> Dan Zhang,<sup>a</sup> Guanzhou Qiu,<sup>a</sup> Xiaohe Liu<sup>a,b,\*</sup>

*a, Department of Inorganic Materials, Central South University, Changsha, Hunan 410083, People's  
Republic of China;*

*b, State Key Laboratory of Powder Metallurgy, Central South University, Changsha, Hunan 410083,  
10 People's Republic of China;*

*c, Institute of Materials Science and Engineering, Lanzhou University, Lanzhou 730000, People's  
Republic of China;*

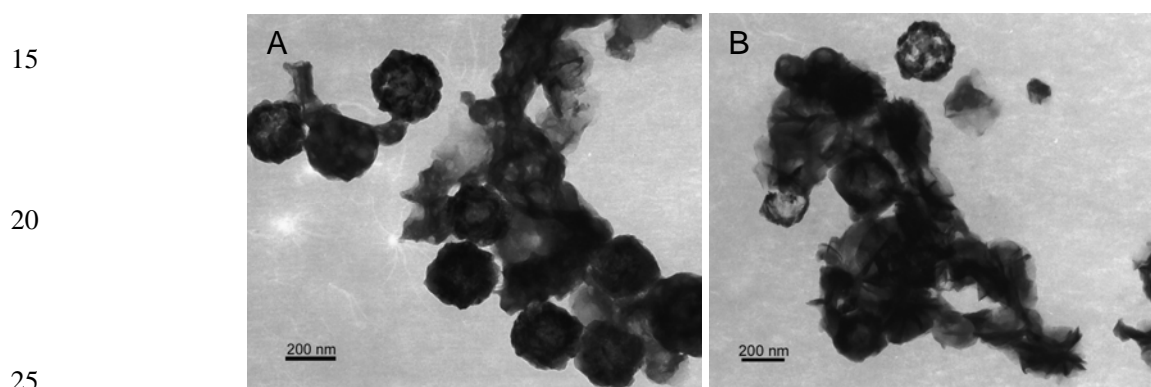

**Figure S1.** TEM images of CoO hollow spheres prepared by using 0.5 mmol (A) and 1.0 mmol (B) CTAB in the presence of oleic acid and oleylamine at 260 °C for 2 h under nitrogen environment.
